# Supplementary material
Source: PubMed Central journal article supplement (PMC11605670)
Supplement: NIHMS2034005-supplement-1.pdf [file NIHMS2034005-supplement-1.pdf]

## SUPPLEMENTARY METHODS

Actual search strategy employed for retrieving relevant studies.

PubMed April 13, 2020; 193 results (Laser interstitial thermal therapy [tiab] OR LITT [tiab] OR laser therapy [mesh]) AND

(stereotactic radiosurgery [tiab] OR SRS [tiab] OR Stereotaxic Techniques [mesh] OR radiosurgery [mesh] OR

gamma-knife [tiab] OR GK [tiab] OR LINAC [tiab] OR linear accelerator OR Particle Accelerators [mesh] OR

Cyber knife [tiab] OR surgical resection [tiab] OR Margins of Excision [mesh]

radiation necrosis [tiab] OR surgery [tiab] OR Surgical Procedures, Operative [mesh]) AND

(glioma [tiab] OR glioma [mesh] OR recurrent glioma [tiab] OR recurrent glioblastoma [tiab] OR

glioblastoma [tiab] OR Glioblastoma [mesh] OR

astrocytoma [tiab] OR astrocytoma [mesh] OR

oligodendroglioma [tiab] OR oligodendroglioma [mesh])

((Laser interstitial thermal therapy [tiab] OR LITT [tiab] OR laser therapy [mesh]) AND (stereotactic radiosurgery [tiab] OR SRS [tiab] OR Stereotaxic Techniques [mesh] OR radiosurgery [mesh] OR gamma-knife [tiab] OR GK [tiab] OR LINAC [tiab] OR linear accelerator OR Particle Accelerators [mesh] OR Cyber knife [tiab] OR surgical resection [tiab] OR Margins of

Excision [mesh] radiation necrosis [tiab] OR surgery [tiab] OR Surgical Procedures, Operative [mesh]) AND (glioma [tiab] OR glioma [mesh] OR recurrent glioma [tiab] OR recurrent glioblastoma [tiab] OR glioblastoma [tiab] OR Glioblastoma [mesh] OR astrocytoma [tiab] OR astrocytoma [mesh] OR oligodendroglioma [tiab] OR oligodendroglioma [mesh]))

Embase 4/13/20; 244 results (Laser interstitial thermal therapy.mp. OR LITT.mp. OR exp laser surgery/)

(stereotactic radiosurgery.mp. OR SRS.mp. OR exp stereotaxic surgery/OR exp stereotactic radiosurgery/OR exp radiosurgery/OR

Gamma knife.mp. OR GK.mp. OR exp gamma knife/OR

LINAC.mp. OR linear accelerator.mp. OR exp linear accelerator/OR

Cyber knife.mp. OR exp CyberKnife/OR surgical resection.mp. OR

radiation necrosis.mp. OR exp radiation necrosis/OR

surgery.mp. AND

(glioma.mp. OR exp glioma/OR recurrent glioma.mp. OR

recurrent glioblastoma.mp. OR glioblastoma.mp. OR exp Glioblastoma/OR

astrocytoma.mp. OR exp astrocytoma/OR

oligodendroglioma.mp. OR exp oligodendroglioma/)

1 (Laser interstitial thermal therapy or LITT).mp. or exp laser surgery/

2 (stereotactic radiosurgery or SRS).mp. or exp stereotaxic surgery/or exp stereotactic radiosurgery/or exp radiosurgery/

3 (Gamma knife or GK).mp. or exp gamma knife/

4 (LINAC or linear accelerator).mp. or exp linear accelerator/

5 Cyber knife.mp. or exp CyberKnife/or surgical resection.mp. or radiation necrosis.mp. or exp radiation necrosis/ or surgery.mp.

6 2 or 3 or 4 or 5

7 glioma.mp. or exp glioma/or recurrent glioma.mp. or recurrent glioblastoma.mp. or glioblastoma.mp. or exp Glioblastoma/or astrocytoma.mp. or exp astrocytoma/or oligodendroglioma.mp. or exp oligodendroglioma/

8 1 and 6 and 7

Scopus 4/13/20; 302 results ((“Laser interstitial thermal therapy” OR LITT OR “laser therapy”) AND (stereotactic radiosurgery OR SRS radiosurgery OR gamma-knife OR GK OR LINAC OR “linear accelerator” OR Cyber knife OR CyberKnife OR “surgical resection” OR “radiation necrosis” OR surgery) AND (glioma OR recurrent glioma OR recurrent glioblastoma OR glioblastoma OR astrocytoma OR oligodendroglioma))

739 results-duplicates = 625 citations in EndNote
